# Supplementary material
Source: PubMed Central journal article supplement (PMC7738280)
Supplement: mmc1.pdf [file mmc1.pdf]

## Supplementary Fig. 1

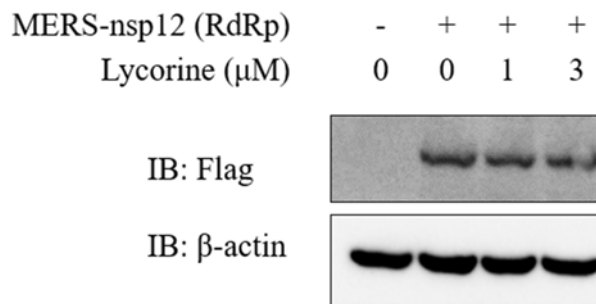

**Supplementary Fig. 1. Consistent MERS-CoV RdRp expression during the cell based MERS-CoV RdRp reporter assay with lycorine treatment.** HEK293T cells were seeded and transfected with Flag-tagged MERS-CoV nsp12 (RdRp) expressing plasmid. After 6 hr, cells was treated with the indicated concentrations of lycorine. Cells were harvested after 16 hours and lysed in Glo lysis buffer (Promega). Lysates were separated on the 8% SDS-PAGE gel and transferred to nitrocellulose membrane (Bio-Rad). Transferred membranes were incubated with 5% skim milk in TBST for 30 min at room temperature. The membranes were rinsed with TBST and incubated with anti-Flag antibody (Abcam) or anti- $\beta$ -actin (Cell signaling Technology) antibodies at 4°C for overnight. HRP-conjugated secondary antibodies (Abcam) were incubated for 1 hour at RT, and the membranes were detected with ECL solution (Thermo) using Chemidoc Touch Imaging System (Bio-Rad).

## Supplementary Fig. 2

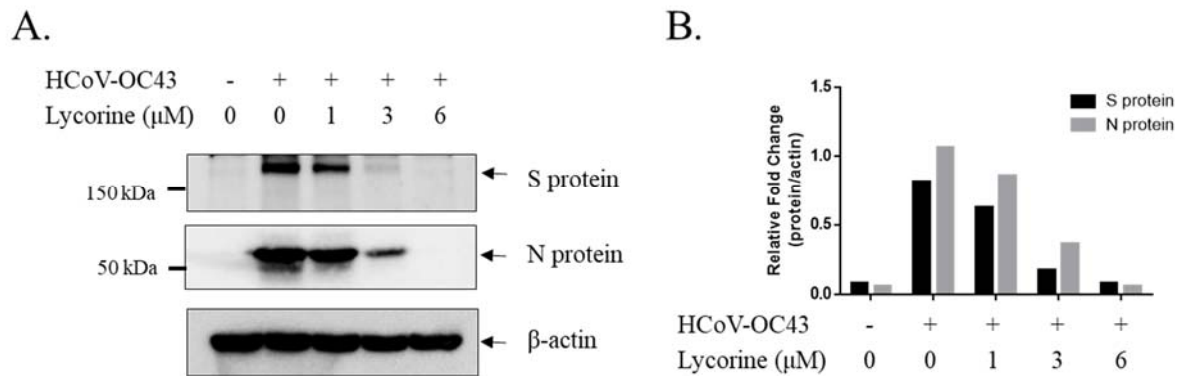

**Supplementary Fig. 2. Dose-dependent inhibition of Human Coronavirus OC43 (HCoV-OC43) spike protein and nucleoprotein expression in MRC-5 cells by Lycorine.** (A) MRC-5 cells (ATCC) were infected with  $10^{3.5}$  TCID<sub>50</sub> HCoV-OC43 (ATCC), treated with Lycorine at indicated concentrations, and incubated at 33°C. After 2 days post infection, cells were lysed. Lysates were separated on the 8% SDS-PAGE gel and transferred to nitrocellulose membranes (Bio-Rad Lab.). The membranes were blocked with 5% skim milk contained in TBST for 30 min at RT, then rinsed with TBST and incubated with anti-Spike (S) protein (CusaBio), anti-Nucleocapsid (N) protein (Merck) or anti- $\beta$ -actin (Cell signaling Technology) specific antibodies at 4°C for overnight. HRP-conjugated secondary antibodies (Abcam) were incubated for 1 hour at RT, and the membranes were detected with ECL solution (Thermo) using Chemidoc Touch Imaging System (Bio-Rad). (B) The protein band intensities of Spike (S) protein and Nucleocapsid (N) protein were quantified.

## Supplementary Table 1.

**Supplementary Table 1.** List of the inhibitory concentration (IC<sub>50</sub>), cytotoxic concentration (CC<sub>50</sub>), and selectivity index (CC<sub>50</sub>/IC<sub>50</sub>, SI) values of lycorine against CoV infection. Data are presented as mean ± SEM of duplicate experiments.

| CoV <sub>s</sub>  | Lycorine                 |        | Remdesivir               |        |
|-------------------|--------------------------|--------|--------------------------|--------|
|                   | (CC <sub>50</sub> >50μM) |        | (CC <sub>50</sub> >50μM) |        |
|                   | IC <sub>50</sub> (μM)    | SI     | IC <sub>50</sub> (μM)    | SI     |
| <b>MERS-CoV</b>   | 2.123 ± 0.053            | >23.55 | 7.407 ± 0.216            | >6.75  |
| <b>SARS-CoV</b>   | 1.021 ± 0.025            | >48.97 | 4.084 ± 0.248            | >12.24 |
| <b>SARS-CoV-2</b> | 0.878 ± 0.022            | >56.95 | 6.499 ± 0.256            | >7.69  |
